# Supplementary material for: The rapid divergence of the Antarctic crinoid species Promachocrinus kerguelensis
Source: bioRxiv or medRxiv preprint supplement (doi:10.1101/666248), 2019-06-12
Supplement: Supplementary file [file media-1.pdf]

**Table S1. Count of the number of sequences per phylogroup per year and per geographical location**

| <b>Georgia</b> | 1996 | 2000 | 2002 | 2004 | 2005 | 2006 | 2008 | 2009 | 2010 | 2011 |
|----------------|------|------|------|------|------|------|------|------|------|------|
| A              | .    | .    | .    | 1    | .    | .    | .    | .    | .    | .    |
| B              | .    | .    | .    | .    | .    | .    | .    | .    | .    | .    |
| C              | .    | .    | .    | .    | .    | .    | .    | .    | .    | .    |
| D              | .    | .    | .    | .    | .    | .    | .    | .    | .    | .    |
| E              | .    | .    | .    | .    | .    | .    | .    | .    | .    | .    |
| F              | .    | .    | .    | .    | .    | .    | .    | .    | .    | .    |
| G              | .    | .    | .    | .    | .    | .    | .    | .    | .    | .    |

| <b>Sandwich</b> | 1996 | 2000 | 2002 | 2004 | 2005 | 2006 | 2008 | 2009 | 2010 | 2011 |
|-----------------|------|------|------|------|------|------|------|------|------|------|
| A               | .    | .    | .    | 9    | .    | .    | .    | .    | .    | .    |
| B               | .    | .    | .    | .    | .    | .    | .    | .    | .    | .    |
| C               | .    | .    | .    | 3    | .    | .    | .    | .    | .    | .    |
| D               | .    | .    | .    | .    | .    | .    | .    | .    | .    | .    |
| E               | .    | .    | .    | .    | .    | .    | .    | .    | .    | .    |
| F               | .    | .    | .    | .    | .    | .    | .    | .    | .    | .    |
| G               | .    | .    | .    | .    | .    | .    | .    | .    | .    | .    |

| <b>WP</b> | 1996 | 2000 | 2002 | 2004 | 2005 | 2006 | 2008 | 2009 | 2010 | 2011 |
|-----------|------|------|------|------|------|------|------|------|------|------|
| A         | .    | .    | .    | .    | .    | .    | .    | .    | .    | .    |
| B         | .    | .    | .    | .    | .    | .    | .    | .    | .    | .    |
| C         | .    | .    | .    | .    | .    | .    | .    | .    | 12   | .    |
| D         | .    | .    | .    | .    | .    | .    | .    | .    | 10   | .    |
| E         | .    | .    | .    | .    | .    | .    | .    | .    | 2    | .    |
| F         | .    | .    | .    | .    | .    | .    | .    | .    | 2    | .    |
| G         | .    | .    | .    | .    | .    | .    | .    | 10   | 2    | .    |

| <b>AS</b> | 1996 | 2000 | 2002 | 2004 | 2005 | 2006 | 2008 | 2009 | 2010 | 2011 |
|-----------|------|------|------|------|------|------|------|------|------|------|
| A         | .    | .    | .    | .    | .    | .    | .    | .    | .    | .    |
| B         | .    | .    | .    | .    | .    | .    | .    | .    | .    | .    |
| C         | .    | .    | .    | .    | .    | .    | 3    | .    | .    | .    |
| D         | .    | .    | .    | .    | .    | .    | 15   | .    | .    | .    |
| E         | .    | .    | .    | .    | .    | .    | .    | .    | .    | .    |
| F         | .    | .    | .    | .    | .    | .    | 1    | .    | .    | .    |
| G         | .    | .    | .    | .    | .    | .    | 3    | .    | .    | .    |

| <b>RS</b> | 1996 | 2000 | 2002 | 2004 | 2005 | 2006 | 2008 | 2009 | 2010 | 2011 |
|-----------|------|------|------|------|------|------|------|------|------|------|
| A         | .    | .    | .    | 85   | .    | .    | 1    | .    | .    | .    |
| B         | .    | .    | .    | 3    | .    | .    | 37   | .    | .    | .    |
| C         | .    | .    | .    | 4    | .    | .    | 6    | .    | .    | .    |
| D         | .    | .    | .    | 27   | .    | .    | 26   | .    | .    | .    |
| E         | .    | .    | .    | 2    | .    | .    | 74   | .    | .    | .    |
| F         | .    | .    | .    | .    | .    | .    | 4    | .    | .    | .    |
| G         | .    | .    | .    | 2    | .    | .    | 26   | .    | .    | .    |

| <b>TAP</b> | 1996 | 2000 | 2002 | 2004 | 2005 | 2006 | 2008 | 2009 | 2010 | 2011 |
|------------|------|------|------|------|------|------|------|------|------|------|
| A          | .    | .    | .    | .    | .    | .    | 32   | .    | .    | .    |
| B          | .    | .    | .    | .    | .    | .    | 54   | .    | .    | .    |
| C          | .    | .    | .    | .    | .    | .    | 179  | .    | .    | .    |

|   |   |   |   |   |   |   |     |   |   |   |
|---|---|---|---|---|---|---|-----|---|---|---|
| D | . | . | . | . | . | . | 78  | . | . | . |
| E | . | . | . | . | . | . | 62  | . | . | . |
| F | . | . | . | . | . | . | 9   | . | . | . |
| G | . | . | . | . | . | . | 240 | . | . | . |

| <b>DS</b> | 1996 | 2000 | 2002 | 2004 | 2005 | 2006 | 2008 | 2009 | 2010 | 2011 |
|-----------|------|------|------|------|------|------|------|------|------|------|
| A         | .    | .    | .    | .    | .    | .    | .    | .    | .    | .    |
| B         | .    | .    | .    | .    | .    | .    | .    | .    | .    | .    |
| C         | .    | .    | .    | .    | .    | .    | .    | .    | 54   | .    |
| D         | .    | .    | .    | .    | .    | .    | .    | .    | 38   | .    |
| E         | .    | .    | .    | .    | .    | .    | .    | .    | 22   | .    |
| F         | .    | .    | .    | .    | .    | .    | .    | .    | 67   | .    |
| G         | .    | .    | .    | .    | .    | .    | .    | .    | 91   | .    |

| <b>KPP</b> | 1996 | 2000 | 2002 | 2004 | 2005 | 2006 | 2008 | 2009 | 2010 | 2011 |
|------------|------|------|------|------|------|------|------|------|------|------|
| A          | .    | .    | .    | .    | .    | .    | .    | .    | .    | 120  |
| B          | .    | .    | .    | .    | .    | .    | .    | .    | .    | .    |
| C          | .    | .    | .    | .    | .    | .    | .    | .    | .    | .    |
| D          | .    | .    | .    | .    | .    | .    | .    | .    | .    | .    |
| E          | .    | .    | .    | .    | .    | .    | .    | .    | .    | .    |
| F          | .    | .    | .    | .    | .    | .    | .    | .    | .    | .    |
| G          | .    | .    | .    | .    | .    | .    | .    | .    | 28   | .    |

| <b>EWS</b> | 1996 | 2000 | 2002 | 2004 | 2005 | 2006 | 2008 | 2009 | 2010 | 2011 |
|------------|------|------|------|------|------|------|------|------|------|------|
| A          | .    | .    | .    | 3    | .    | .    | .    | .    | .    | .    |
| B          | 2    | .    | .    | 1    | .    | .    | .    | .    | .    | .    |
| C          | 39   | 37   | .    | 24   | .    | .    | .    | .    | .    | .    |
| D          | 9    | 2    | .    | 2    | 8    | .    | .    | .    | .    | .    |
| E          | 3    | 10   | .    | 11   | .    | .    | .    | .    | .    | .    |
| F          | .    | 4    | .    | .    | 3    | .    | .    | .    | .    | .    |
| G          | 6    | 3    | .    | 14   | 44   | .    | 1    | .    | .    | .    |

| <b>SAW</b> | 1996 | 2000 | 2002 | 2004 | 2005 | 2006 | 2008 | 2009 | 2010 | 2011 |
|------------|------|------|------|------|------|------|------|------|------|------|
| A          | .    | .    | 4    | .    | .    | .    | .    | .    | .    | .    |
| B          | .    | .    | .    | .    | .    | .    | .    | .    | .    | .    |
| C          | .    | .    | 7    | .    | .    | 3    | .    | 32   | .    | .    |
| D          | .    | .    | .    | .    | .    | 2    | .    | 11   | .    | .    |
| E          | .    | .    | .    | .    | .    | .    | .    | 25   | .    | .    |
| F          | .    | .    | .    | .    | .    | 2    | .    | .    | .    | .    |
| G          | .    | 2    | .    | .    | .    | .    | .    | .    | .    | .    |

| <b>SAE</b> | 1996 | 2000 | 2002 | 2004 | 2005 | 2006 | 2008 | 2009 | 2010 | 2011 |
|------------|------|------|------|------|------|------|------|------|------|------|
| A          | .    | .    | 2    | .    | .    | .    | .    | .    | .    | .    |
| B          | .    | .    | .    | .    | .    | .    | .    | .    | .    | .    |
| C          | .    | .    | 23   | .    | .    | 6    | .    | .    | .    | .    |
| D          | .    | .    | .    | .    | .    | .    | .    | .    | .    | .    |
| E          | .    | .    | .    | .    | .    | .    | .    | .    | .    | .    |
| F          | .    | .    | .    | .    | .    | 1    | .    | .    | .    | .    |
| G          | .    | .    | 7    | .    | .    | .    | .    | .    | .    | .    |

| <b>Antarctica</b> | 1996 | 2000 | 2002 | 2004 | 2005 | 2006 | 2008 | 2009 | 2010 | 2011 |
|-------------------|------|------|------|------|------|------|------|------|------|------|
| A                 | .    | .    | 6    | 98   | .    | .    | 33   | .    | .    | 120  |
| B                 | 2    | .    | .    | 4    | .    | .    | 91   | .    | .    | .    |
| C                 | 39   | 37   | 30   | 31   | .    | 9    | 188  | 32   | 66   | .    |
| D                 | 9    | 2    | .    | 29   | 8    | 2    | 119  | 11   | 48   | .    |
| E                 | 3    | 10   | .    | 13   | .    | .    | 136  | 25   | 24   | .    |
| F                 | .    | 4    | .    | .    | 3    | 3    | 14   | .    | 69   | .    |
| G                 | 6    | 5    | 7    | 16   | 44   | .    | 270  | 10   | 121  | .    |
